# Supplementary material for: EMI and microwave absorbing efficiency of polyaniline-functionalized reduced graphene oxide/γ-Fe2O3/epoxy nanocomposite
Source: Royal Society of Chemistry journal article supplement (doi:10.1039/d0sm00266f), 2020-01-01
Supplement: d0sm00266f1.pdf [file d0sm00266f1.pdf]

## Supporting Information

### EMI and Microwave absorbing efficiency of polyaniline functionalized reduced graphene oxide@ $\gamma$ -Fe<sub>2</sub>O<sub>3</sub>@Epoxy Nanocomposite

Rimpa Jaiswal, Kavita Agarwal\*, Rakesh Kumar, Ritush Kumar, Kingsuk Mukhopadhyay and N Eswara Prasad

Defence Materials and Stores Research and Development Establishment, Kanpur 208 013, India

Email of Corresponding Author: Dr. Kavita Agarwal Email Id.: [kavita.agarwal2005@gmail.com](mailto:kavita.agarwal2005@gmail.com)\*

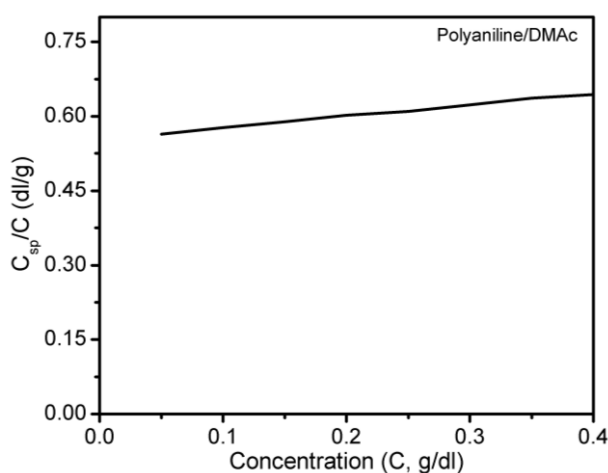

**S1: Reduced viscosity versus concentration of PANi at 25 °C<sup>1,2</sup>**

Viscometry method has been used to evaluate the intrinsic viscosity at 25 °C.

Reduced viscosity ( $\eta_{sp}/C$ ) =  $\eta_{rel}-1/C$

Relative viscosity ( $\eta_{rel}$ ) =  $\frac{\eta_s}{\eta_o} = \frac{t_s}{t_o}$

Where,  $\eta_s$  and  $\eta_o$  are viscosity and  $t_s$  and  $t_o$  are the time in second of samples and solvent (DMAc) respectively.

Intrinsic viscosity ( $\eta$ ) =  $(\eta_{sp}/C)_{c=0}$  ..... (1)

Mark Houwink equation (2) is used to determine the weight average molecular weight of PANi

$\eta = KM_w^a$  ..... (2)

where,  $M_w$  is weight average molecular weight,  $K$  ( $52.63 \times 10^{-5}$  dl/g) and  $a$  (0.7546) are constant for particular polymer<sup>1,2</sup>.

Intrinsic viscosity of PANi was observed to be 0.548 dl/g from intercept as shown in S1 graph. The  $M_w$  of PANi is 9951 calculated by using equation 2.

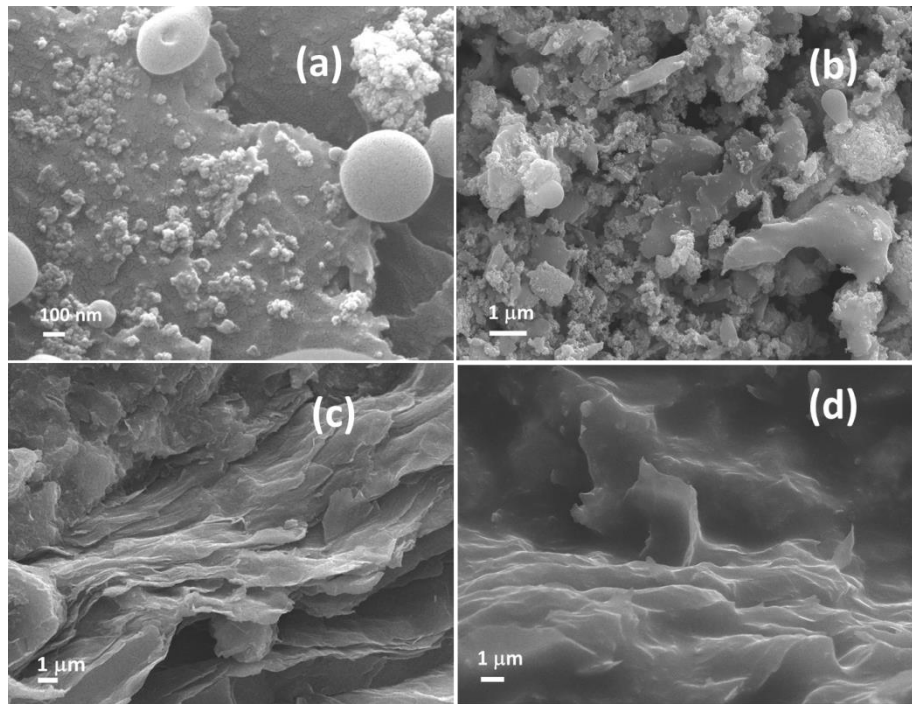

**S2:** FESEM images of rGO@PANi@Fe<sub>2</sub>O<sub>3</sub> filler (a) (1:1), (b) (3:1), and rGO@PANi@Fe<sub>2</sub>O<sub>3</sub>@Epoxy Nanocomposite 60 wt % (c) (1:1), (d) (3:1)

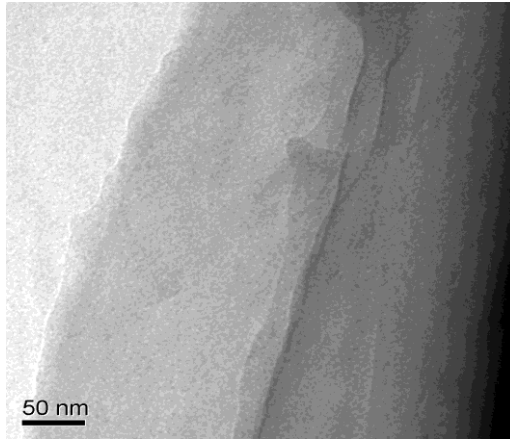

**S3: TEM of rGO**

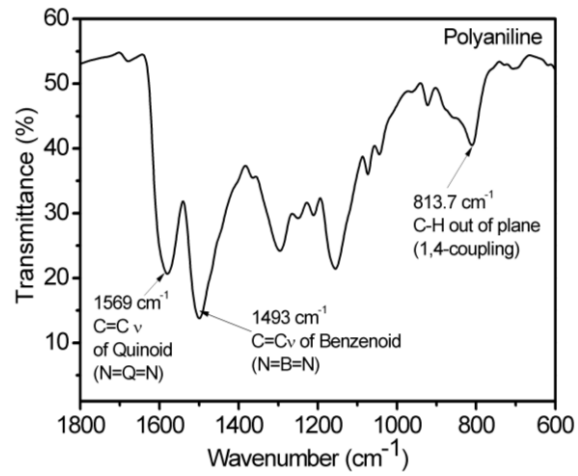

**S4: FTIR of Polyaniline [1]**

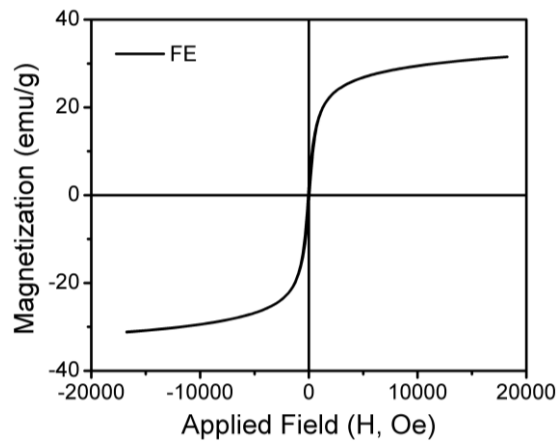

**S5: VSM of  $\text{Fe}_2\text{O}_3$ @Epoxy (FE) nanocomposite**

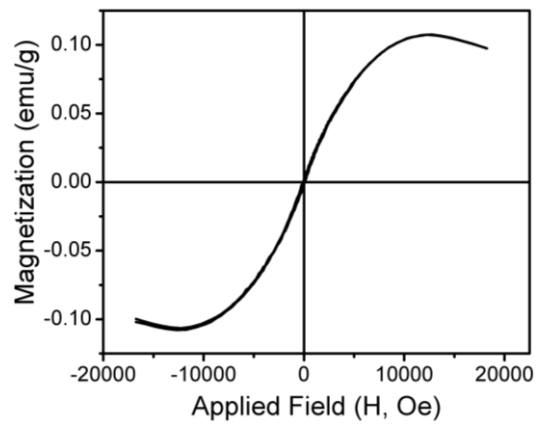

**S6: VSM of PANi**

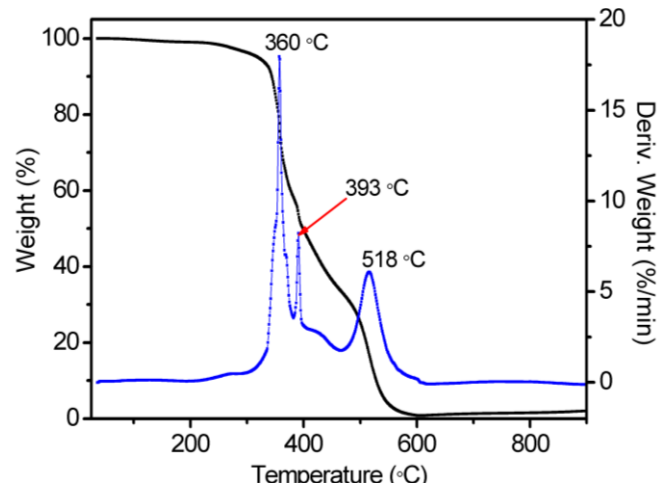

**S7: TGA of neat epoxy**

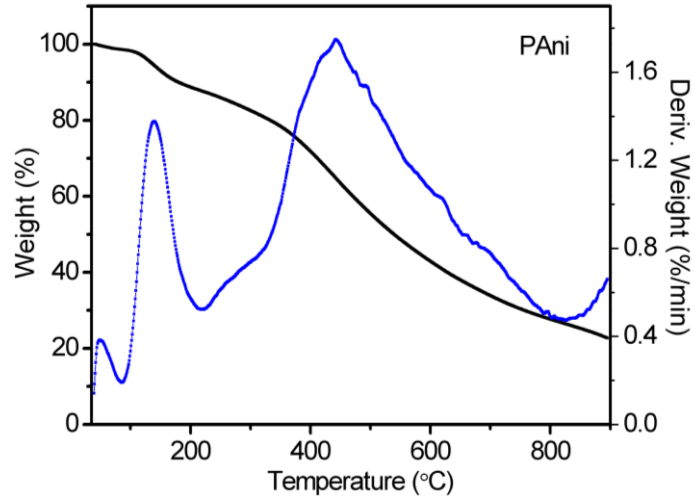

**S8: TGA of Polyaniline**

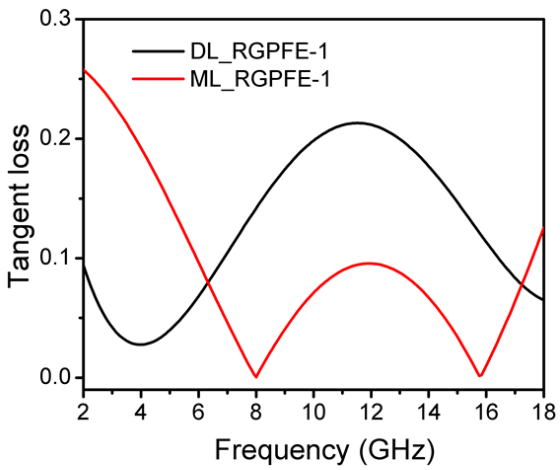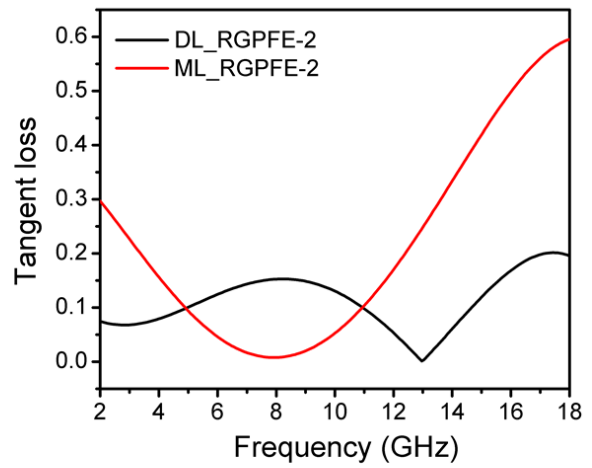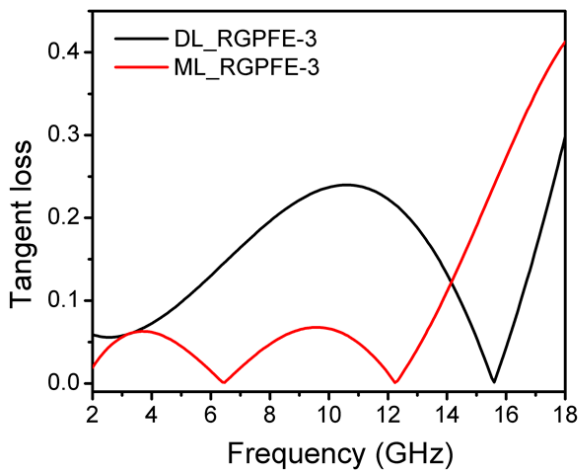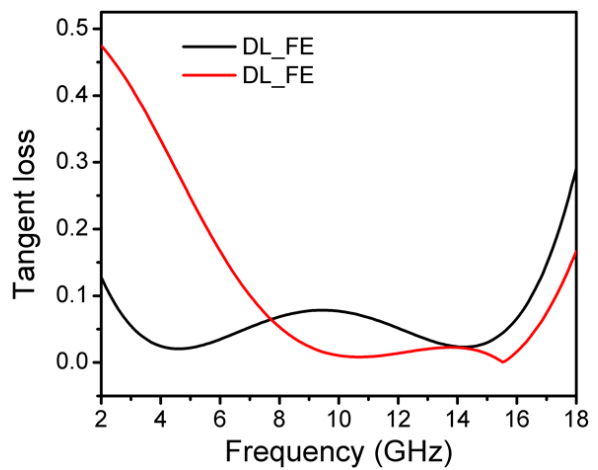

**S9: Dielectric tangent loss (DL) and Magnetic tangent loss (ML) of RGPFE and FE nanocomposites**

**S10: Table shows the microwave absorption in X-band frequency region**

| <b>Sample's Name</b> | <b>Frequency</b> | <b>RL (dB)</b> | <b>% Microwave Absorption</b> |
|----------------------|------------------|----------------|-------------------------------|
| RGPFE-1              | 10.5             | -9.49          | 88.75                         |
| RGPFE-2              | 7.74             | -5.93          | 74.47                         |
| RGPFE-3              | 8.47             | -10.26         | 90.58                         |
| FE                   | 10.64            | -2.37          | 42.05                         |

**References:**

1. H. R. Tantawy, D. E. Aston, J. R. Smith and J. L. Young, A Comparison of Electromagnetic Shielding with Polyaniline Nanopowders Produced in Solvent-limited Conditions, *ACS Appl. Mater. Interfaces*, 2013, **5**, 4648–4658.
2. H. Zengin, E. Bayir and G. Zengin, Solution properties of polyaniline/carbon particle composites, *J. Polym. Eng.*, 2016, **36**, 3, 299–307.
